# Supplementary material for: Efficiency of RNA interference is improved by knockdown of dsRNA nucleases in tephritid fruit flies
Source: PubMed Central journal article supplement (PMC6936256; doi:10.1098/rsob.190198), 2019-12-04
Supplement: rsob190198supp3.pdf [file rsob190198supp3.pdf]

**Supplementary information to “Efficiency of RNA interference is improved by knockdown of dsRNA nucleases in tephritid fruit flies” in Open Biology**

Alison Tayler, Daniel Heschuk, David Giesbrecht, Jae Yeon Park, and Steve Whyard\*  
Department of Biological Sciences, University of Manitoba, Winnipeg, MB, R3T 2N2, Canada  
DOI: 10.1098/rsob.20160198

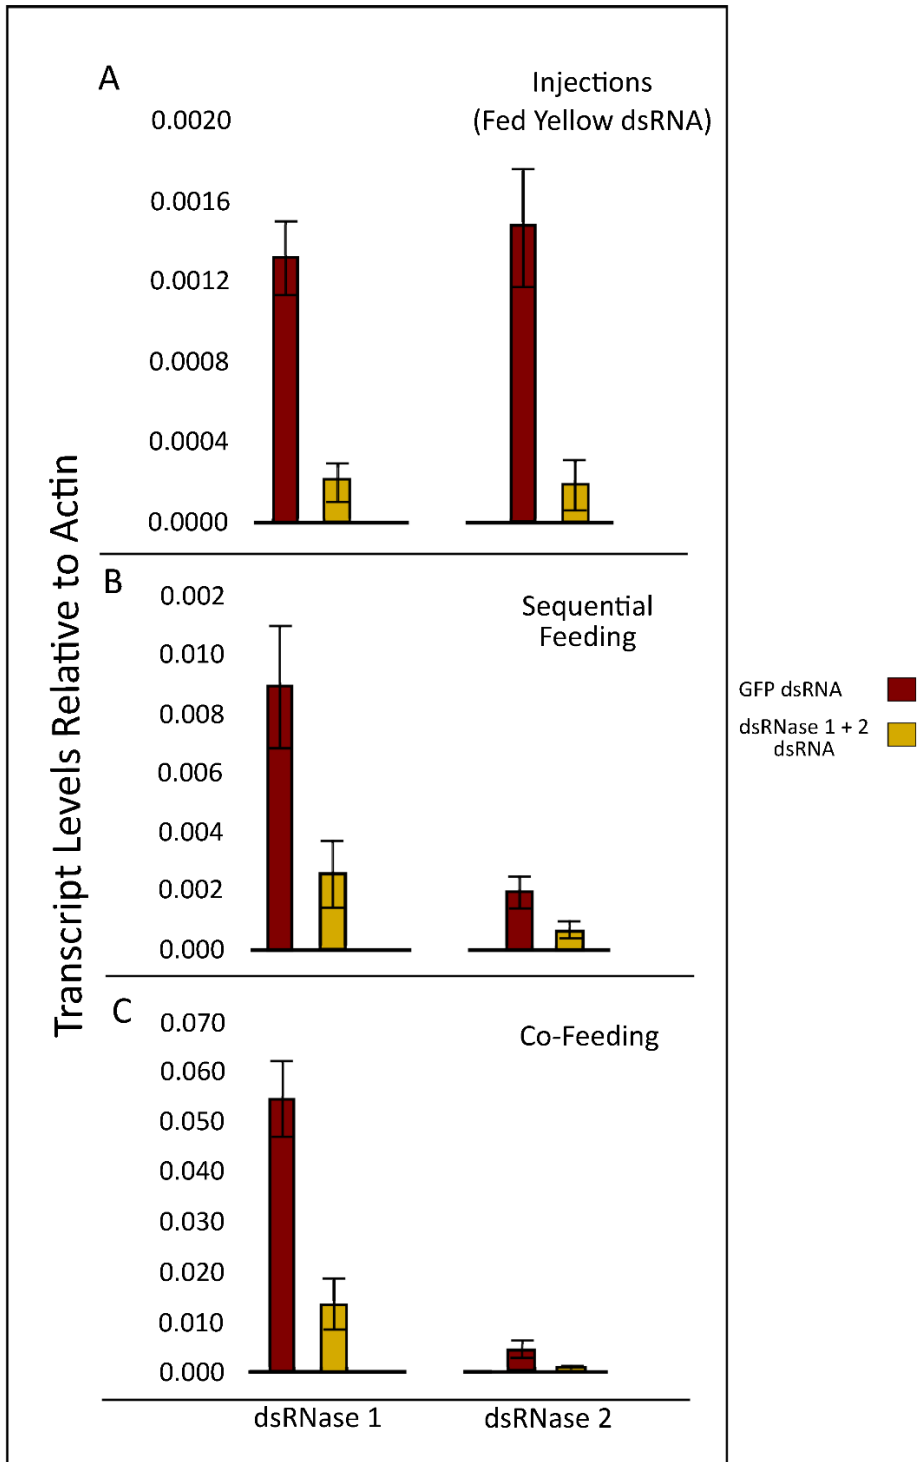

**Figure S3.** Knockdown of *dsRNase1* and *dsRNase2* following different dsRNA delivery methods. A) DsRNAs were injected into the haemolymph of adults (mixed sexes) and 6 days later, RNA was extracted to assess levels of *dsRNase1* and *dsRNase2* using qRT-PCR. Negative controls were injected with *gfp*-dsRNA, while experimental treatments were injected with a 50:50 mixtures of dsRNAs targeting both nuclease gene transcripts. Values represent the means and standard errors of 8 biological replicates; different letters indicate significant differences (ANOVA with Tukey's *post hoc* test,  $p < 0.05$ ).
