# Supplementary material for: Efficiency of RNA interference is improved by knockdown of dsRNA nucleases in tephritid fruit flies
Source: PubMed Central journal article supplement (PMC6936256; doi:10.1098/rsob.190198), 2019-12-04
Supplement: rsob190198supp5.pdf [file rsob190198supp5.pdf]

**Supplementary information to “Efficiency of RNA interference is improved by knockdown of dsRNA nucleases in tephritid fruit flies” in Open Biology**

Alison Tayler, Daniel Heschuk, David Giesbrecht, Jae Yeon Park, and Steve Whyard\*  
Department of Biological Sciences, University of Manitoba, Winnipeg, MB, R3T 2N2, Canada  
DOI: 10.1098/rsob.20160198

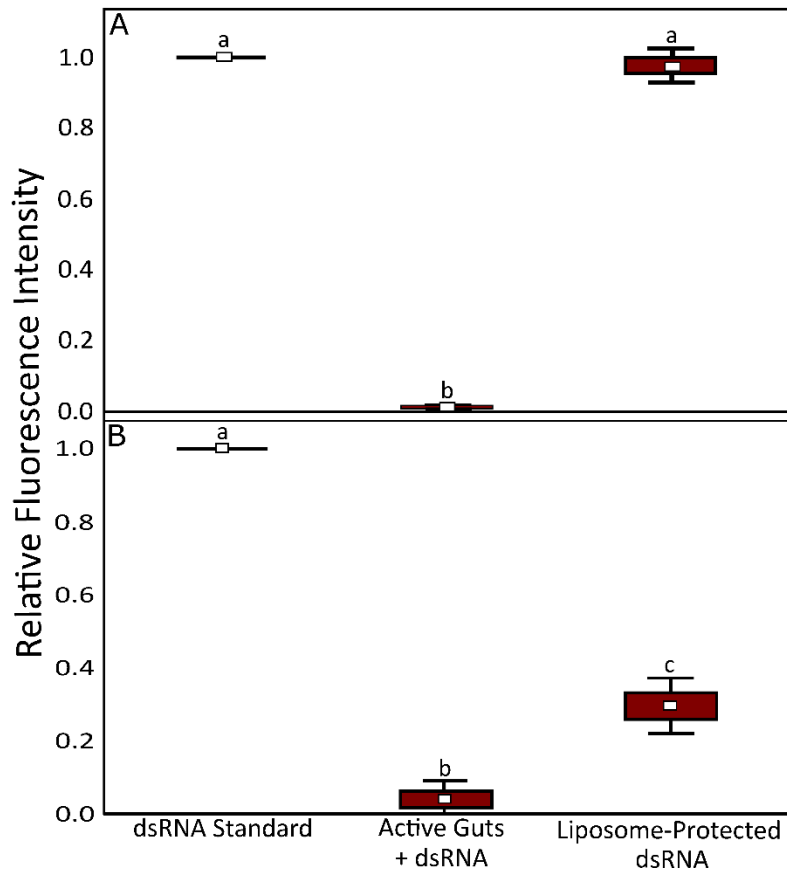

**Figure S5.** Degradation of naked dsRNA and dsRNA combined with a liposome agent in (mixed sex) adult gut contents measured by band fluorescence intensity following 1.5% gel electrophoresis. A) DsRNA degradation after a 10 minute exposure to gut extracts; non-degraded dsRNA (dsRNA standard) was used as the reference, and dsRNA exposed to gut extracts (active guts + dsRNA) was fully degraded within 10 minutes, while liposome-protected dsRNA remained intact. B) DsRNA degradation after 60 minutes' exposure to gut extracts. Liposomes still provided some protections to the dsRNA.
