# Supplementary material for: Efficiency of RNA interference is improved by knockdown of dsRNA nucleases in tephritid fruit flies
Source: PubMed Central journal article supplement (PMC6936256; doi:10.1098/rsob.190198), 2019-12-04
Supplement: rsob190198supp6.pdf [file rsob190198supp6.pdf]

**Supplementary information to “Efficiency of RNA interference is improved by knockdown of dsRNA nucleases in tephritid fruit flies” in Open Biology**

Alison Tayler, Daniel Heschuk, David Giesbrecht, Jae Yeon Park, and Steve Whyard\*  
 Department of Biological Sciences, University of Manitoba, Winnipeg, MB, R3T 2N2, Canada  
 DOI: 10.1098/rsob.20160198

**Table S1:** DNA sequences used to generate dsRNA purchased from agroRNA (Seoul, Korea).

| <b>Gene name</b>       | <b>Sequence</b>                                                                                                                                                                                                                                                                                                                                                                                                                     |
|------------------------|-------------------------------------------------------------------------------------------------------------------------------------------------------------------------------------------------------------------------------------------------------------------------------------------------------------------------------------------------------------------------------------------------------------------------------------|
| <b><i>gfp</i></b>      | GAGAAGAACTCTTCACTGGAGTTGGTCCCAGTTCCTTGTGAATTAGATGGCGATGTTAATGGGCAAA<br>AATTCTCTGTCACTGGAGAGGGTGAAGGTGATGCAACATACGGAAAACCTTACCCTTAATTTTATTTGC<br>ACTACTGGGAAGCTACCTGTTCCATGGCCAACACTTGTCACTACTTTCTTATGGTGTTCAATGCTTCT<br>CAAGATACCCAGATCATATGAAACAGCATGACTTTTTCAAGAGTGCCATGCCCGAAGGTTATGTACAG<br>GAAAGAACTATATTTTTCAAAGATGAC                                                                                                         |
| <b><i>gus</i></b>      | CCCTTACGCTGAAGAGATGCTCGACTGGGCAGATGAACATGGCATCGTGGTGATTGATGAAACTGCT<br>GCTGTCGGCTTTAACCTCTCTTTAGGCATTGGTTTTGAAGCGGGCAACAAGCCGAAAGAAGCTGTACAG<br>CGAAGAGGCAGTCAACGGGGAAACTCAGCAAGCGCACTTACAGGCGATTAAAGAGCTGATAGCGCG<br>TGACAAAAACCACCAAGCGTGGTGATGTGGAGTATTGCCAACGAACCGGATACCCGTCGCAAGGT<br>GCACGGGAATATTTGCGGCCACTGGCGGAAGCAACGCGTAACTCGACCCGACGCGTCCGATCACCT<br>GCGTCAATGTAATGTTCTGCGACGCTCACACCGATACCATCAGCGATCTCTTTGATGTGCTGTGCC |
| <b><i>dsRNase1</i></b> | GTATATCTAGATCGATGGCAAGAGTGTGCATAAACTGTATACTCAAGCCACTCAACTGGCGACCATCA<br>ACGAACATTTGGGCGGTGATGCCAGTAAATACTTTGACTCTGCCAAGAACGTTTACTTAGCACGTGGT<br>CATATGGCCGCCAAAGCTGATTTTGATTATGGTCTCGAACACGCGCCACTTTCCTCTTCATTAACGCC<br>GCTCCACAGTGGCAGGTCTTCAATGCCGGAATTGGGCTCGTATCGAAGATGGTGTGCGTGCAAAGG<br>TTTCTCTGCAGGTTGGTATGTCGATTGCTACACTGGTGTTTACGGAGTGACCACTCTGCCAACAGC<br>GACGGTGTGCAAACCCCACTCTCGAGTATAC                                 |
| <b><i>dsRNase2</i></b> | TGGTGACGTCGGTAGTTTCATCTGTTACGTCGGTAGTTCATCAGTTACGTTTATGTATGGAGGTGTG<br>GGGTATGTATCAGCCGTGGATAATGTTGGATATGGTGTGCGGGTCCATCATTCTCAGTATTGGCAA<br>GTAAGCTTTTCACTACGGTCTCTTTGAGTGCAGTATGCCTGCCTTCAACTGCTAATAAGCAAGCTA<br>GCACTAGCACAAGCTTCACTGCTTTTCCGCCGAATACATTTGACCGTTTCGCGTTAAACTGTTAAAGC<br>CTTGAGAAGTATTTGGTATTTAAATAATTGTAGACCATCGAAGTTTGGCACCGAAATCTAATCAAGTTT<br>AGACGAATGTGCCTTCGTAATGGTTGATAACCCATAATCCACCGCAACT               |
