# Supplementary material for: Efficiency of RNA interference is improved by knockdown of dsRNA nucleases in tephritid fruit flies
Source: PubMed Central journal article supplement (PMC6936256; doi:10.1098/rsob.190198), 2019-12-04
Supplement: rsob190198supp7.pdf [file rsob190198supp7.pdf]

**Supplementary information to “Efficiency of RNA interference is improved by knockdown of dsRNA nucleases in tephritid fruit flies” in Open Biology**

Alison Tayler, Daniel Heschuk, David Giesbrecht, Jae Yeon Park, and Steve Whyard\*  
 Department of Biological Sciences, University of Manitoba, Winnipeg, MB, R3T 2N2, Canada  
 DOI: 10.1098/rsob.20160198

**Table S2.** Primers used to amplify gene targets in *B. tryoni*.

| <b>Gene</b>            | <b>Primer</b>             | <b>Primer Sequence (5'-3')</b>       |
|------------------------|---------------------------|--------------------------------------|
| <b><i>Actin</i></b>    | Qfly actin qRT F          | CCATGCCATTCTCCGTTTGGATTTG            |
|                        | Q fly actin qRT R         | AGCTGTGGTGGTGAACGAGTAG               |
| <b><i>dsRNase1</i></b> | Qfly dsRNase1 RNAi XbaI F | GTATATCTAGATCGATGGCAAGAGTGTGCGATAAAC |
|                        | Qfly dsRNase1 RNAi XhoI R | GTATACTCGAGAGTGGGGTTTGCACAC          |
|                        | Qfly dsRNase1 qRT F       | CGTTTCGCTCAGCAATATGA                 |
|                        | Qfly dsRNase1 qRT R       | AAGGTGATACGGTCCACACC                 |
| <b><i>dsRNase2</i></b> | Qfly dsRNase2 RNAi XbaI F | GTATATCTAGATGGTGACGTCGGTAGTTTCA      |
|                        | Qfly dsRNase2 RNAi XhoI R | GTATACTCGAGAGTTGCGGTGGATTATGGG       |
|                        | Qfly dsRNase2 qRT F       | CATTGACATCTGGGAGCGTG                 |
|                        | Qfly dsRNase2 qRT R       | CAATTGGGAACGTGTGGAGG                 |
| <b><i>yellow</i></b>   | Qfly yellow RNAi XbaI F   | GTATATCTAGACACCCGCTCAAGAACTAAGC      |
|                        | Qfly yellow RNAi XhoI R   | GTATACTCGAGCGTACTCCACATCCACATCG      |
|                        | Qfly yellow qRT F         | CACGTTTGAGTCACGGCGTTCTTT             |
|                        | Qfly yellow qRT R         | CACCAGCAGCGGATTAAGCAATGT             |
