# Supplementary material for: Efficiency of RNA interference is improved by knockdown of dsRNA nucleases in tephritid fruit flies
Source: PubMed Central journal article supplement (PMC6936256; doi:10.1098/rsob.190198), 2019-12-04
Supplement: rsob190198supp9.pdf [file rsob190198supp9.pdf]

**Supplementary information to “Efficiency of RNA interference is improved by knockdown of dsRNA nucleases in tephritid fruit flies” in Open Biology**

Alison Tayler, Daniel Heschuk, David Giesbrecht, Jae Yeon Park, and Steve Whyard\*  
 Department of Biological Sciences, University of Manitoba, Winnipeg, MB, R3T 2N2, Canada  
 DOI: 10.1098/rsob.20160198

**Table S4.** Identity matrix of *yellow* genes at the nucleotide level. Sequence identity analyses were performed using the BLAST program of the National Center for Biotechnology Information (NCBI) (<http://blast.ncbi.nlm.nih.gov/Blast.cgi>).

| Accession Number and Species Name               | % Nucleotide Identity |           |           |           |           |           |           |
|-------------------------------------------------|-----------------------|-----------|-----------|-----------|-----------|-----------|-----------|
|                                                 | <i>Dm</i>             | <i>Rz</i> | <i>Bt</i> | <i>Cc</i> | <i>Bo</i> | <i>Bl</i> | <i>Bd</i> |
| <i>NM_142031.4_Drosophila_melanogaster (Dm)</i> | 100                   | 53.82     | 48.68     | 53.95     | 52.81     | 55.09     | 54.49     |
| <i>XM_017625303.1_Rhagoletis_zephyria (Rz)</i>  | 53.82                 | 100       | 63.24     | 73.52     | 74.82     | 73.58     | 75.44     |
| <i>JHQJ01008064.1_B.tryoni (Bt)</i>             | 48.68                 | 63.24     | 100       | 63.7      | 88.74     | 91.88     | 93.44     |
| <i>XM_020859968.1_Ceratitis_capitata (Cc)</i>   | 53.95                 | 73.52     | 63.7      | 100       | 73.49     | 72.33     | 74.68     |
| <i>XM_014235121.1_B.oleae (Bo)</i>              | 52.81                 | 74.82     | 88.74     | 73.49     | 100       | 89.81     | 90.75     |
| <i>XM_018931191.1_B.latifrons (Bl)</i>          | 55.09                 | 73.58     | 91.88     | 72.33     | 89.81     | 100       | 95.55     |
| <i>XM_011210388.2_B.dorsalis (Bd)</i>           | 54.49                 | 75.44     | 93.44     | 74.68     | 90.75     | 95.55     | 100       |
